# Supplementary material for: Nationwide evaluation of mutation-tailored anti-EGFR therapy selection in patients with colorectal cancer in daily clinical practice
Source: PubMed Central journal article supplement — J Clin Pathol. 2021 Oct 21;75(10):706–11. doi: 10.1136/jclinpath-2021-207865 (PMC9510427; doi:10.1136/jclinpath-2021-207865), 2021-10-21
Supplement: jclinpath-2021-207865supp002.pdf [file jclinpath-2021-207865supp002.pdf]

Supplementary table 1: Clinical characteristics of patients diagnosed with stage IV CRC between October 1 and December 31, 2017.

|                                                      | Total cohort<br>N=620<br>N (%) | Uptake mutation analysis<br>N=293; 47% |        |      |
|------------------------------------------------------|--------------------------------|----------------------------------------|--------|------|
|                                                      |                                | % (N)                                  | P*     | OR** |
| <b>Gender</b>                                        |                                |                                        | ns     |      |
| Male                                                 | 330 (53.2%)                    | 47.6% (157)                            |        |      |
| Female                                               | 290 (46.8%)                    | 46.9% (136)                            |        |      |
| <b>Age at initial diagnosis</b>                      |                                |                                        | <0.001 |      |
| <50                                                  | 58 (9.4%)                      | 74.1% (43)                             | <0.001 | 3.6  |
| 50-70                                                | 263 (42.2%)                    | 54.0% (142)                            | 0.004  | 1.6  |
| >70                                                  | 299 (48.2%)                    | 36.1% (108)                            | <0.001 | 0.4  |
| <b>Topography</b>                                    |                                |                                        | 0.045  |      |
| <b>Right-sided colon</b>                             | 236 (38.1%)                    | 41.1% (97)                             | 0.017  | 0.7  |
| Cecum                                                | 110 (17.7%)                    | 43.6% (48)                             |        |      |
| Appendix                                             | 18 (2.9%)                      | 27.8% (5)                              |        |      |
| Ascending colon                                      | 68 (11.0%)                     | 44.1% (30)                             |        |      |
| Hepatic flexure                                      | 13 (2.1%)                      | 38.5% (5)                              |        |      |
| Transverse colon                                     | 27 (4.4%)                      | 33.3% (9)                              |        |      |
| <b>Left-sided colon</b>                              | 370 (59.7%)                    | 64.8% (190)                            | 0.014  | 1.5  |
| Descending colon                                     | 25 (4.0%)                      | 36.0% (9)                              |        |      |
| Sigmoid colon                                        | 150 (24.2%)                    | 60.0% (90)                             |        |      |
| Splenic flexure                                      | 17 (2.7%)                      | 35.3% (6)                              |        |      |
| Rectosigmoid junction                                | 33 (5.3%)                      | 54.5% (18)                             |        |      |
| Rectum                                               | 145 (23.4%)                    | 46.2% (67)                             |        |      |
| Unspecified colon side                               | 14 (2.3%)                      | 42.9% (6)                              | ns     |      |
| <b>Liver metastasis only</b>                         | 206 (33.2%)                    | 51.5% (106)                            | ns     |      |
| <b>Retroperitoneum or peritoneum metastasis only</b> | 73 (11.8%)                     | 23.3% (17)                             | <0.001 | 0.3  |
| <b>Metastasis in multiple organs</b>                 | 283 (45.6%)                    | 53.0% (150)                            | 0.010  | 1.5  |
| <b>Histology</b>                                     |                                |                                        | ns     |      |
| Adenocarcinoma                                       | 540 (87.1%)                    | 49.1% (265)                            |        |      |
| Mucinous carcinoma                                   | 41 (6.6%)                      | 39.0% (16)                             |        |      |
| Signet ring carcinoma                                | 16 (2.6%)                      | 25.0% (4)                              |        |      |
| Carcinoma, unspecified and other                     | 23 (3.7%)                      | 34.8% (8)                              |        |      |
| <b>Tumor grade</b>                                   |                                |                                        | 0.017  |      |
| Well differentiated                                  | 12 (1.9%)                      | 58.3% (7)                              | ns     |      |
| Moderately differentiated                            | 341 (55.0%)                    | 52.5% (179)                            | 0.005  | 1.6  |
| Poorly differentiated/undifferentiated               | 99 (16.0%)                     | 42.4% (42)                             | ns     |      |
| Unspecified                                          | 168 (27.1%)                    | 38.7% (65)                             | 0.011  | 0.6  |
| <b>Performance status</b>                            |                                |                                        | <0.001 |      |
| WHO 0                                                | 176 (28.4%)                    | 60.2% (106)                            | <0.001 | 2.1  |
| WHO 1                                                | 127 (20.5%)                    | 52.8% (67)                             | ns     |      |
| WHO 2                                                | 41 (6.6%)                      | 53.3% (16)                             | ns     |      |
| WHO 3                                                | 21 (3.4%)                      | 23.8% (5)                              | 0.043  | 0.3  |
| WHO 4                                                | 3 (0.5%)                       | 33.3% (1)                              | ns     |      |
| Unspecified                                          | 252 (40.6%)                    | 38.9% (98)                             | 0.001  | 0.6  |
| <b>Geographical region of diagnosis</b>              |                                |                                        | ns     |      |
| Region 1                                             | 50 (8.1%)                      | 56.0% (28)                             |        |      |
| Region 2                                             | 90 (14.5%)                     | 40.0% (36)                             |        |      |
| Region 3                                             | 116 (18.7%)                    | 51.7% (60)                             |        |      |
| Region 4                                             | 100 (16.1%)                    | 48.0% (48)                             |        |      |
| Region 5                                             | 52 (8.4%)                      | 53.8% (28)                             |        |      |
| Region 6                                             | 73 (11.8%)                     | 42.5% (31)                             |        |      |
| Region 7                                             | 139 (22.4%)                    | 44.6% (62)                             |        |      |

\*Fisher's exact test was applied to calculate significance. \*\*OR=Odds ratio.
